# Supplementary material
Source: MDPI journal article supplement (https://www.mdpi.com/2073-4395/11/12/2573)
Supplement: s1 [file s1]

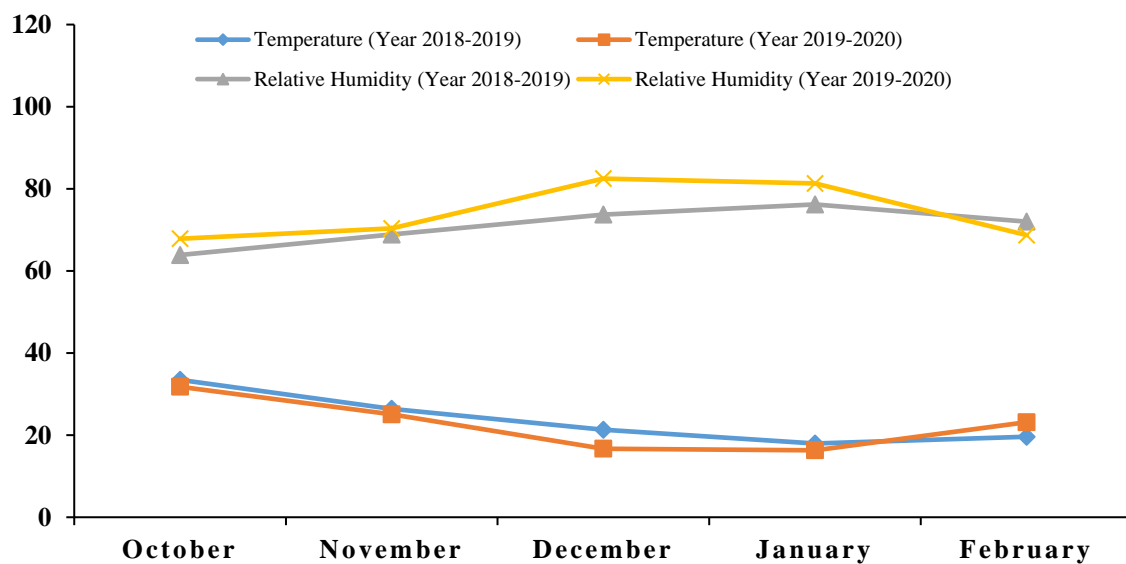

**Figure S1.** Meteorological data of mean temperature and mean relative humidity during 2019 and 2020 experiment periods.

**Table S1.** Physicochemical Analysis of Soil.

| Soil Physical Features |                       |     | Chemical Features  |                                 |                                   |                                  |
|------------------------|-----------------------|-----|--------------------|---------------------------------|-----------------------------------|----------------------------------|
| Texture                | Saturation percentage | pH  | Organic matter (%) | Nitrogen (mg Kg <sup>-1</sup> ) | Phosphorus (mg Kg <sup>-1</sup> ) | Potassium (mg Kg <sup>-1</sup> ) |
| Season 2018-2019       |                       |     |                    |                                 |                                   |                                  |
| Sandy loam             | 18                    | 8.1 | 0.39               | 98                              | 4.50                              | 110                              |
| Season 2019-2020       |                       |     |                    |                                 |                                   |                                  |
| Sandy loam             | 16                    | 8.1 | 0.51               | 102                             | 5.01                              | 127                              |
